# Supplementary material
Source: MDPI journal article supplement (https://www.mdpi.com/1996-1073/16/2/979)
Supplement: s1 [file s1]

## SUPPORTING INFORMATION

### **Structural and Electrochemical Properties of Musa acuminata Fiber Derived Hard Carbon as Anodes of Sodium-Ion batteries**

Meenatchi Thenappan<sup>1</sup>, Kouthaman Mathiyalagan<sup>1</sup>, Mozaffar Abdollahifar<sup>2,3,\*</sup>, Subadevi Rengapillai<sup>1,\*</sup> and Sivakumar Marimuthu<sup>1,\*</sup>

<sup>1</sup> #120, Energy Materials Lab, Department of Physics, Science Block, Alagappa University, Karaikudi-630003, Tamil Nadu, India.

<sup>2</sup> Institute for Particle Technology, Technische Universität Braunschweig, Volkmaroder Str. 5, 38104

Braunschweig, Germany.

<sup>3</sup> Battery LabFactory Braunschweig (BLB), Technische Universität Braunschweig, Langer Kamp 19, 38106

Braunschweig, Germany.

\* Correspondence: 1. m.abdollahifar@tu-braunschweig.de (Mozaffar Abdollahifar) Tel.: +49 531 391-94664

2. susiva73@yahoo.co.in & sivakumarm@alagappauniversity.ac.in (M.Sivakumar); Tel: +914565223304

3. susimsk@yahoo.co.in & subadevir@alagappauniversity.ac.in (R.Subadevi), Tel: +914565223306

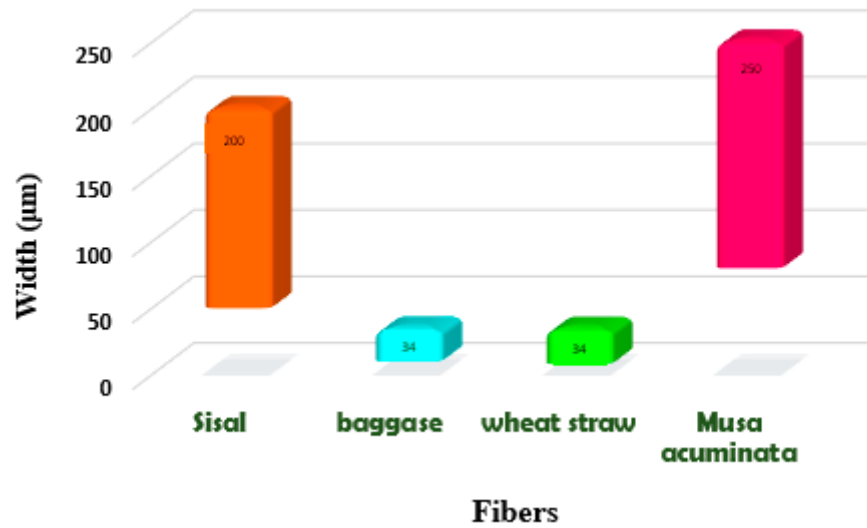

Figure S1: Bar graph for various Fibers and their Width

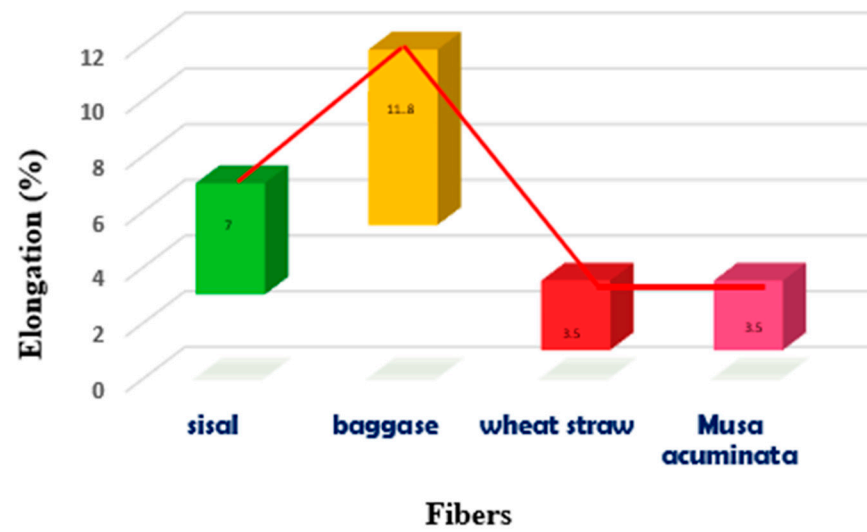

Figure S2: Bar Graph for various Fibers and their elongations

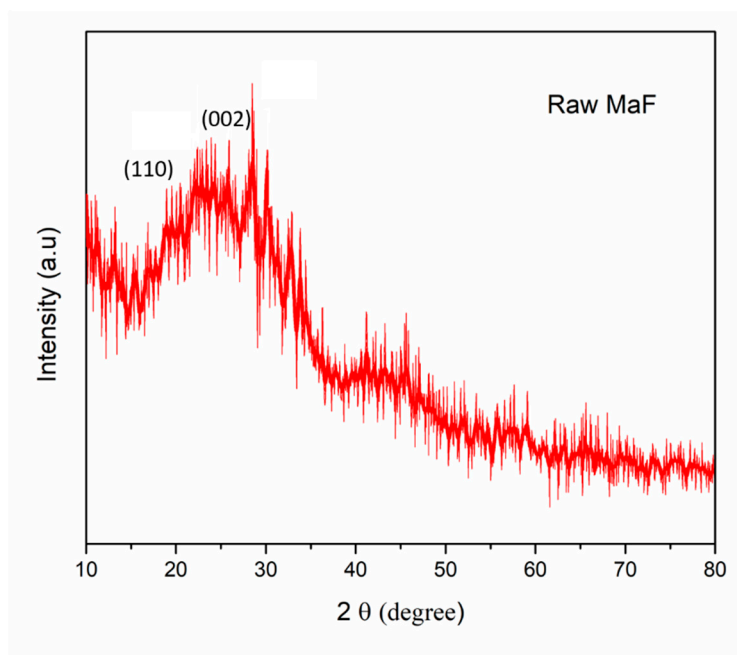

Figure S3: XRD Pattern of Raw MaF

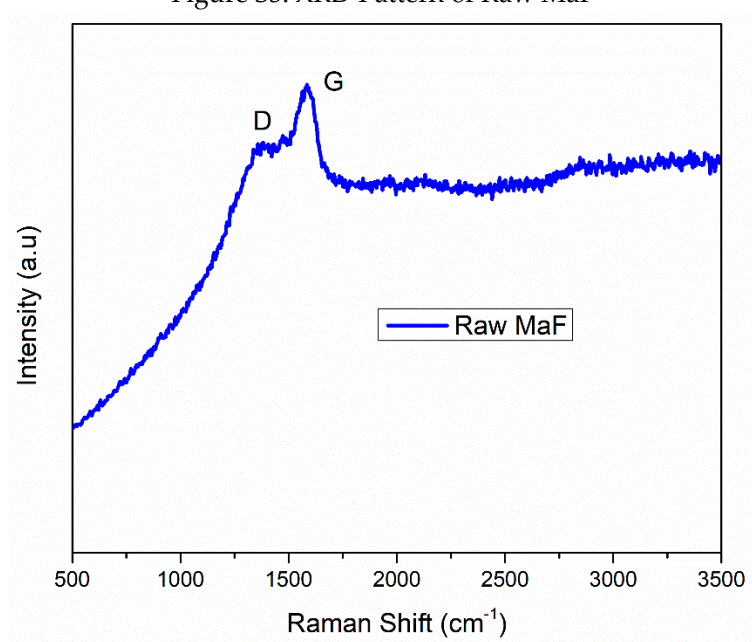

Figure S4: Raman spectra of Raw MaF

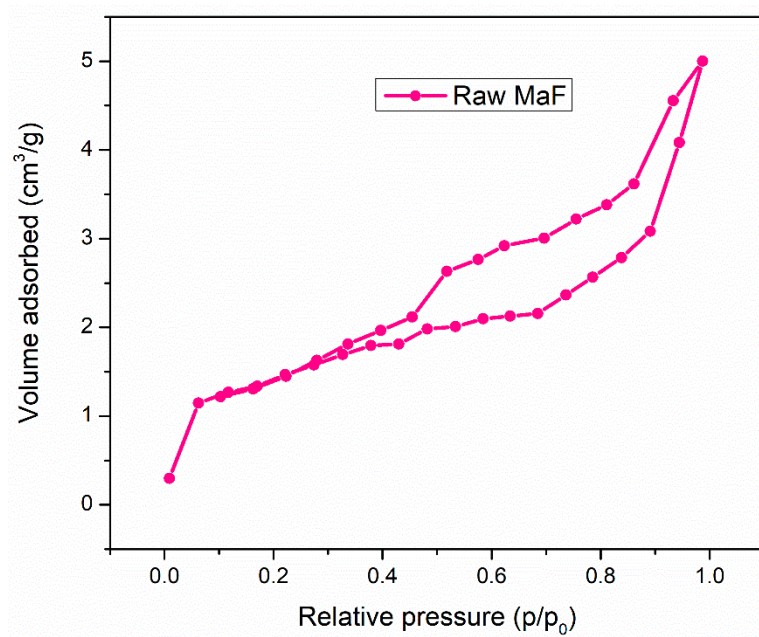

Figure S5: Nitrogen adsorption and Desorption of Raw MaF

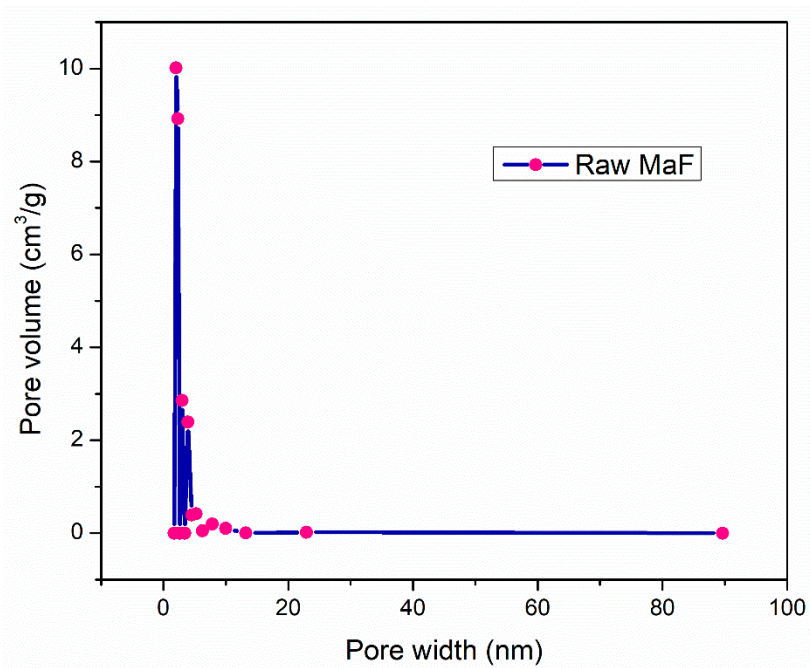

Figure S6: Pore size Distribution of Raw MaF

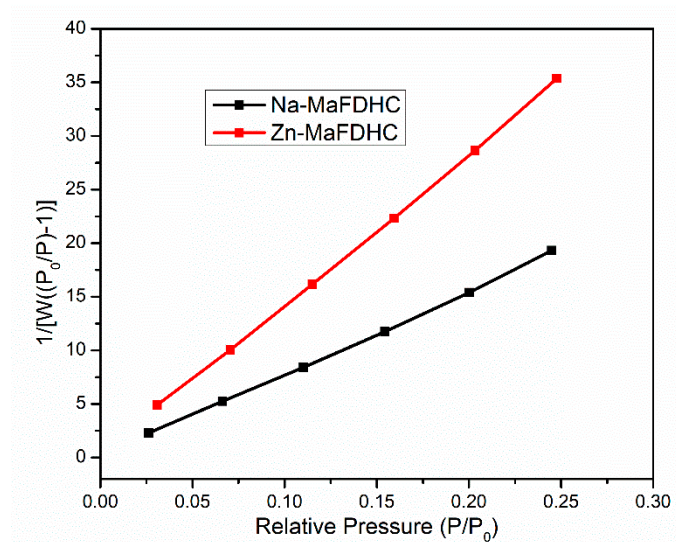

Figure S7: Nitrogen adsorption plot for Na-MaFDHC and Zn-MaFDHC

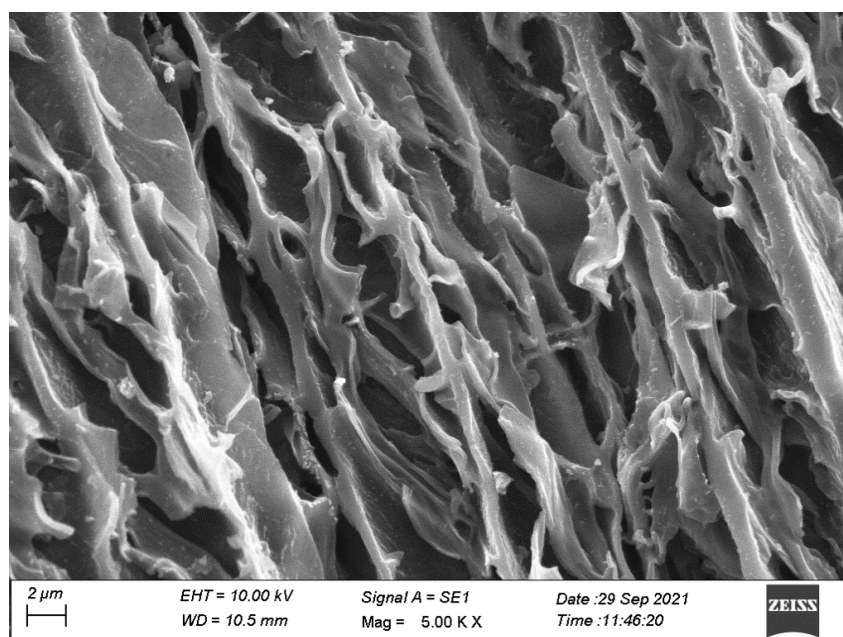

Figure S8: SEM image of Raw MaF



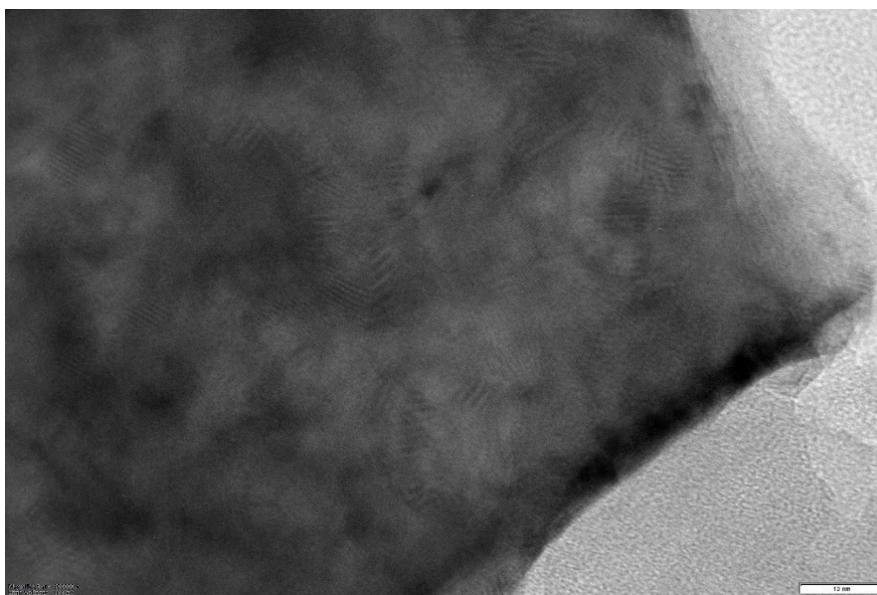

Figure S9: TEM image of Raw MaF

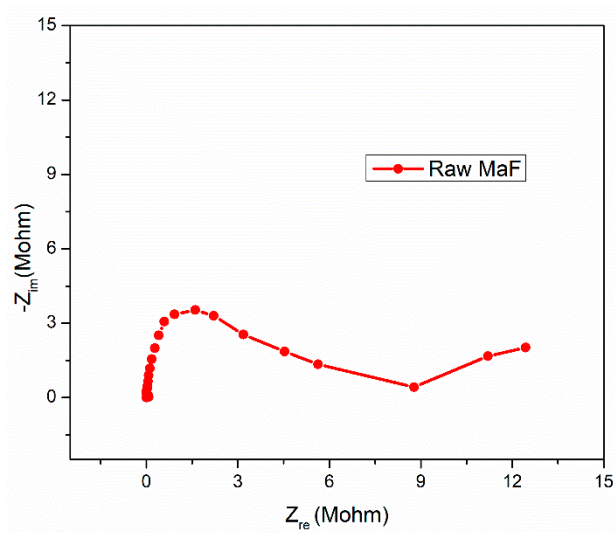

Figure S10: Nyquist plot of Raw MaF

**Table S1:** Physical property of natural fibers.

| Sl. No | Fibers            | Width in ( $\mu\text{m}$ ) | Elongation in (%) |
|--------|-------------------|----------------------------|-------------------|
| 1      | Sisal             | 50 - 200                   | 03 - 07           |
| 2      | Baggage           | 10 - 34                    | 5.5 – 11.8        |
| 3      | Wheat straw       | 08 - 34                    | 1.0 – 3.5         |
| 4      | Musa<br>acuminata | 80 - 250                   | 1.0 – 3.5         |

**Table S2:** Sodium-ion Diffusion coefficient of MaFDHC.

| Material  | $R_s$ ( $\Omega$ ) | $R_{CT}$ ( $\Omega$ ) | $D_{Na^+}$ ( $cm^2 s^{-1}$ ) |
|-----------|--------------------|-----------------------|------------------------------|
| Zn-MaFDHC | 27.5               | 263                   | $1.3 \times 10^{-15}$        |
| Na-MaFDHC | 47.76              | 327                   | $1.5 \times 10^{-15}$        |

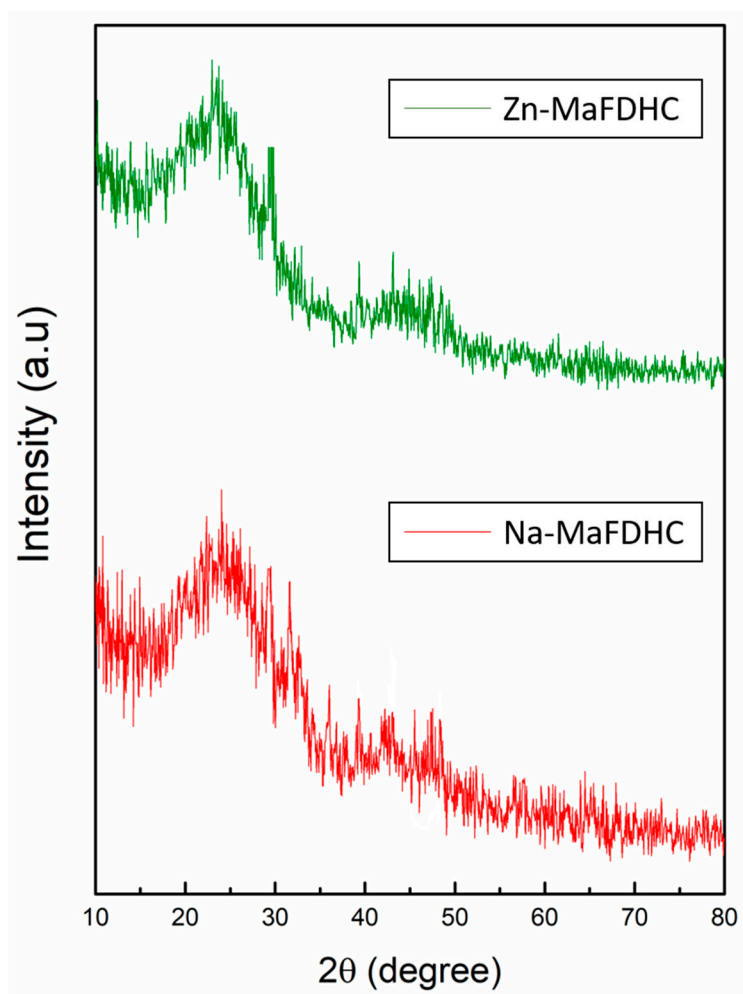

**Figure S11:** XRD images of Na-MaFDHC and Zn-MaFDHC after 100 cycles
